# Supplementary material
Source: PubMed Central journal article supplement (PMC10231372)
Supplement: kiad129_supplementary_data.pdf [file kiad129_supplementary_data.pdf]

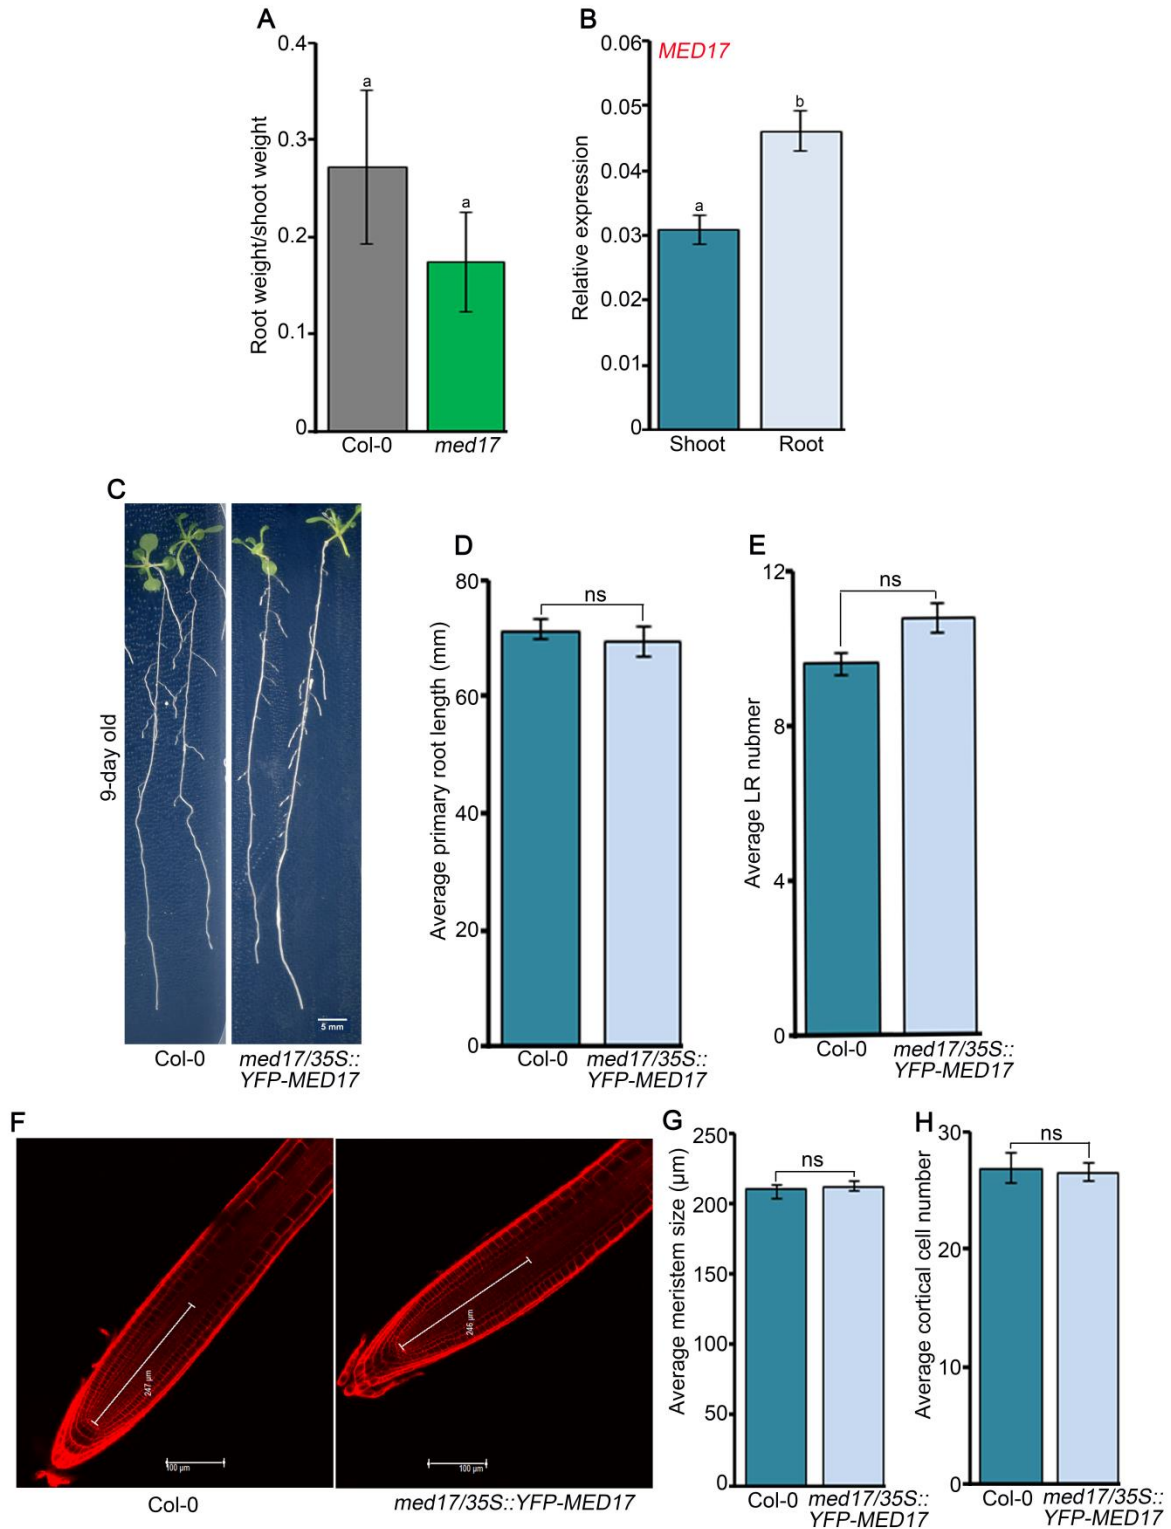

**Supplemental Figure S1. Root phenotype of *med17* is rescued by its complementation with *35S::YFP-MED17*.** **A**, Ratio of root and shoot biomass of 7-days old Col-0 and *med17* seedlings. Weight of root and shoot of 7-days old seedlings were measured for calculating the ratio. Quantification was performed on three independent biological replicates (n=3). Bar plots represent mean values and the error bars denote SE.

Statistical difference has been depicted by  $p$  value as assessed by paired ttest. **B**, RT-qPCR showing expression of *MED17* in the shoot and root parts of 7-days old Col-0 seedlings. **C**, Root phenotype of Col-0 and *med17/35S::YFP-MED17* seedlings. Length of the scale bar in the image is 5 mm. **D**, Graph showing the length of primary roots in Col-0 and *med17/35S::YFP-MED17* seedlings. **E**, Graph showing the number of lateral roots (LR) in Col-0 and *med17/35S::YFP-MED17* seedlings. **In C-E**, seedlings were grown on ½ MS for nine-days. Lengths of primary roots were measured using ImageJ. Data shown are average of three independent biological replicates containing at least 15 seedlings. Bar plots represent mean values and error bars denote SE. Statistical difference has been depicted by  $p$  value as assessed by one-way ANOVA and Tukey's HSD posthoc test. **F**, Col-0 and *med17/35S::YFP-MED17* root tips stained with PI. White line shows the length of the meristematic zone. Length of the scale bar in the image is 100  $\mu$ m. **G**, Graph showing size of root meristem. **H**, Graph showing cortical cell numbers. **In F-H**, seedlings were grown on ½ MS for four-days and then processed for confocal imaging. Meristem length and cortical cell number were counted using ImageJ. Data shown are average of three independent biological replicates containing at least 10 seedlings. Bar plots represent mean values and error bars denote SE. Statistical difference has been depicted by  $p$  value as assessed by one-way ANOVA and Tukey's HSD posthoc test. For all the graphs,  $p$ -value of 0.05 or lower ( $p \leq 0.05$ ) was considered statistically significant, whereas  $p$  value greater than 0.05 ( $p > 0.05$ ) was considered non-significant (ns).

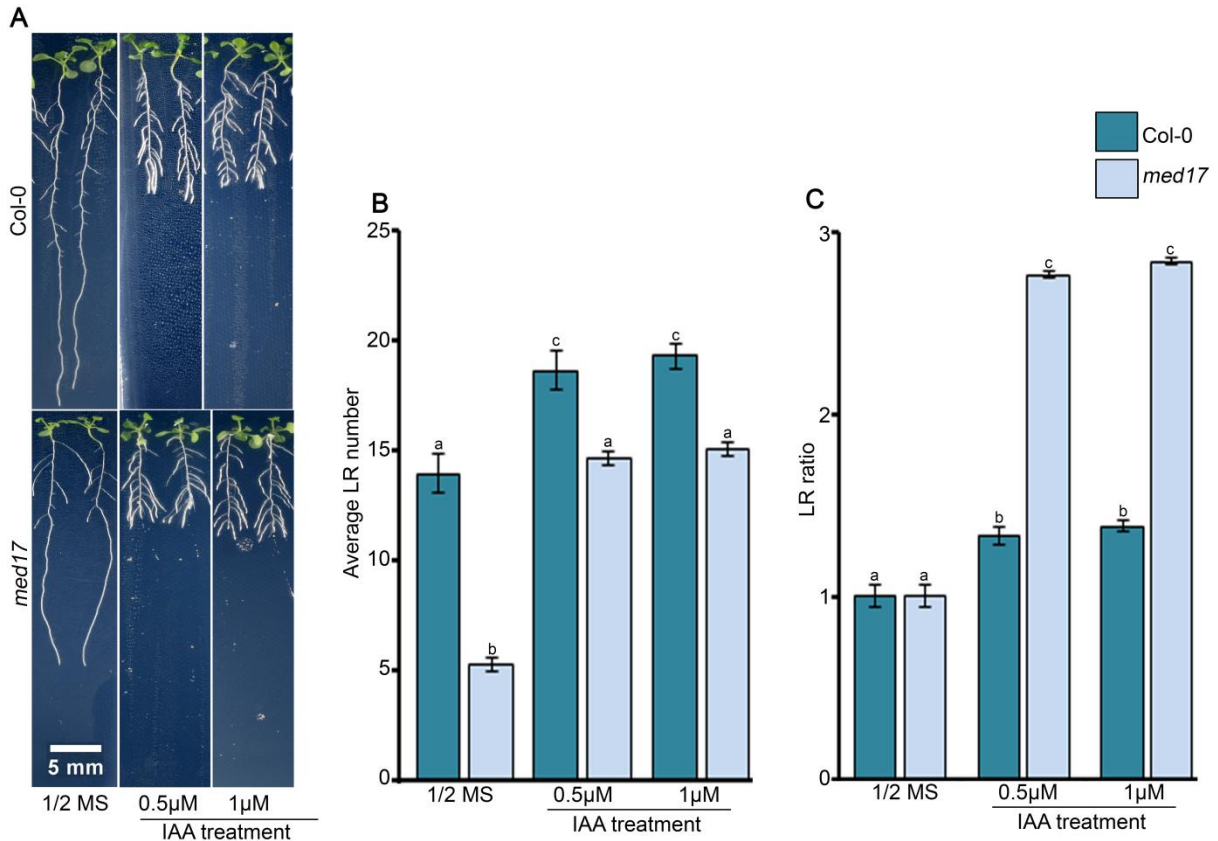

**Supplemental Figure S2. Effect of exogenous auxin on lateral roots.** **A**, Root phenotype of Col-0 and *med17* seedlings after treatment with IAA. Length of the scale bar in the image is 5 mm. **B**, Graph showing lateral roots (LRs) number in the Col-0 and *med17* after exogenous auxin treatment. **C**, Graph showing LR ratio in the Col-0 and *med17* after exogenous auxin treatment. **B-C**, Four-day old Col-0 and *med17* seedlings were transferred to  $\frac{1}{2}$  MS plates containing different concentration of IAA (0.5  $\mu$ M and 1  $\mu$ M) for another 4-days and LR numbers were counted. For plotting LR ratio total number of LR after auxin treatment was divided by total number of LR on  $\frac{1}{2}$  MS. Four-day old seedlings were transferred to  $\frac{1}{2}$  MS plates containing different concentration of IAA (0.5  $\mu$ M and 1  $\mu$ M) for another 4-day and LR numbers were counted. Data shown are average of three independent biological replicates containing at least 20 seedlings. Bar plots represent mean values and error bars denote SE. Statistical difference has been depicted by  $p$  value as assessed by one-way ANOVA and Tukey's HSD posthoc test. For all the graphs,  $p$ -value of 0.05 or lower ( $p \leq 0.05$ ) was considered statistically significant, whereas  $p$  value greater than 0.05 ( $p > 0.05$ ) was considered non-significant (ns).

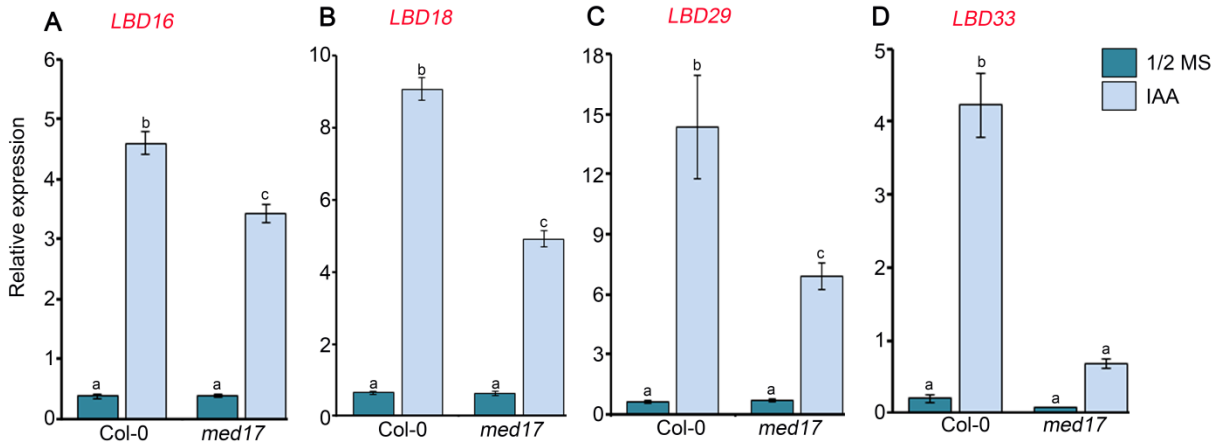

**Supplemental Figure S3. MED17 regulates expression of auxin-responsive *LBD* genes.** A-D, Reverse transcriptase-quantitative PCR (RT-qPCR) analysis showing expression of *LBD* genes (*LBD16*, *LBD18*, *LBD29*, *LBD33*) after IAA treatment (Related to Figure 2E-H). Seven-day old Col-0 and *med17* seedlings were treated with IAA (10  $\mu$ M) for 3 hr. Gene expression values were calculated as  $\Delta$ Ct. RT-qPCR analysis was performed on three independent biological replicates (n=3). Bar plots represent mean values and error bars denote SE. Statistical difference has been depicted by *p* value as assessed by one-way ANOVA and Tukey's HSD posthoc test. For all the graphs, *p*-value of 0.05 or lower ( $p \leq 0.05$ ) was considered statistically significant, whereas *p* value greater than 0.05 ( $p > 0.05$ ) was considered non-significant (ns).

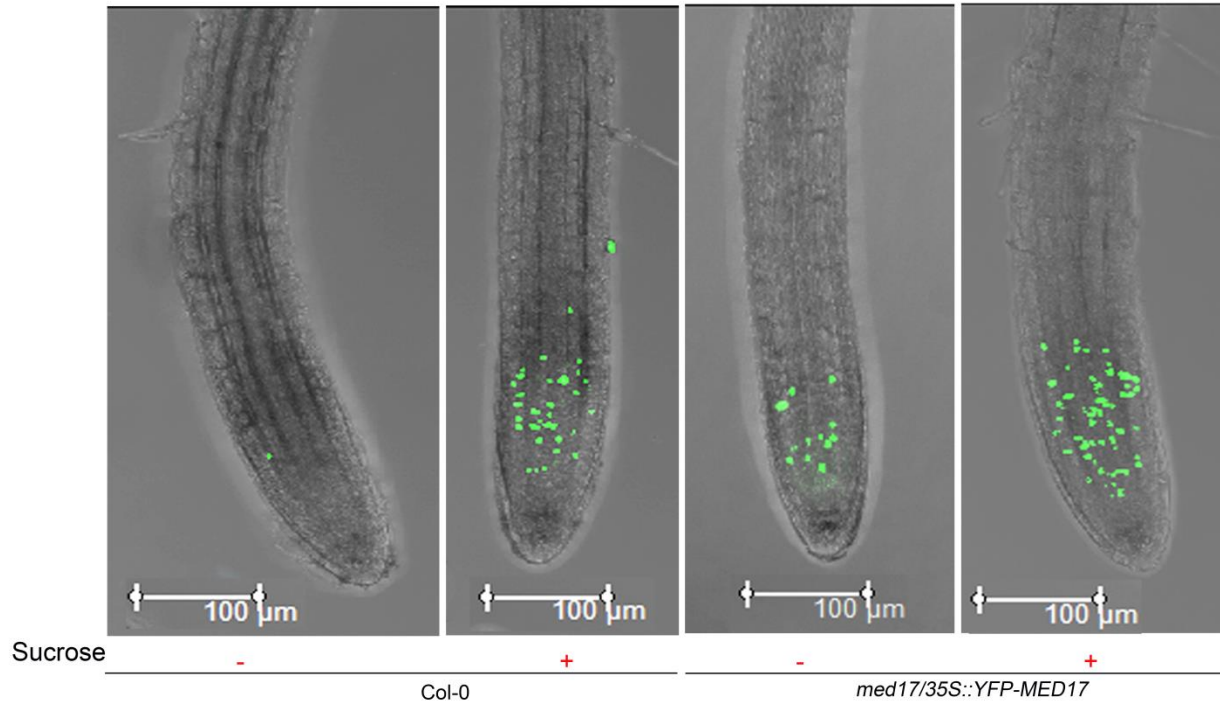

**Supplemental Figure S4. Defective root meristem activation of *med17* is rescued by 35S::YFP-MED17.** Confocal images showing EDU staining of nuclei. Four-day old Col-0 and *med17/35S::YFP-MED17* seedlings were treated with (90 mM) or without (0 mM) sucrose for 3 hr followed by EDU staining and confocal imaging. Length of the scale bar in the image is 100  $\mu$ m. Data shown are representative of three biological replicates (n=3).

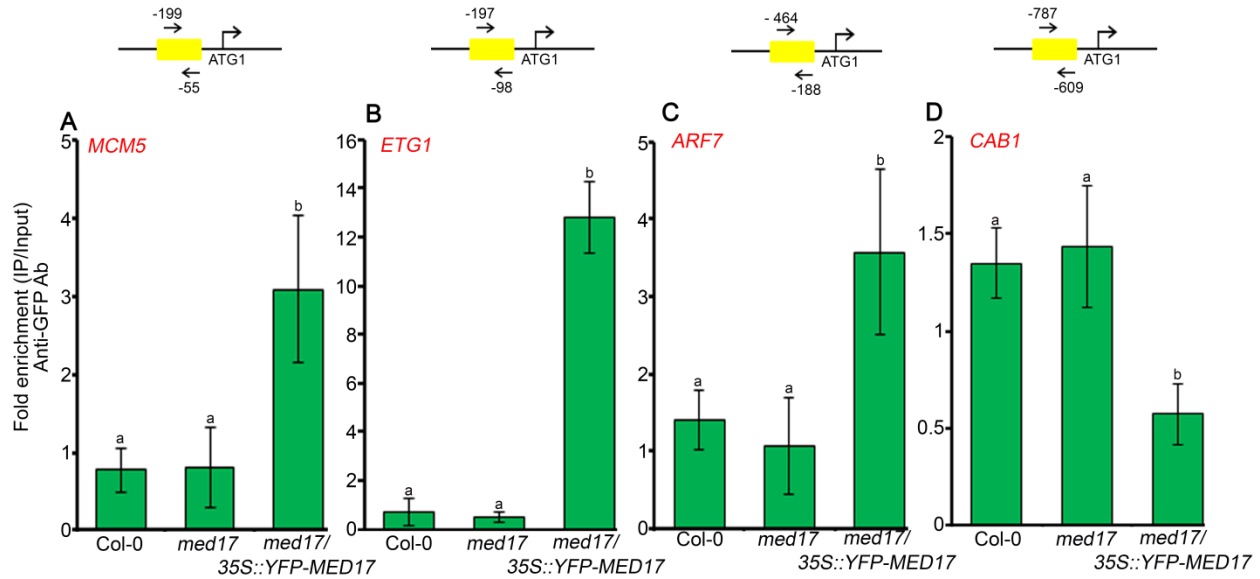

**Supplemental Figure S5. Second biological replicate showing enrichment of MED17 at the promoters of *ARF7* and cell-cycle genes.** A-D, ChIP-qPCR showing enrichment of YFP-MED17 at the promoters of *MCM5*, *ETG1*, *ARF7* and *CAB1* in seven-day-old Col-0 and *med17/35S::YFP-MED17* seedlings (related to 4E-G and 5G). Amplicon positions relative to ATG are shown in the upper panel. Amount of immunoprecipitated DNA was quantified by comparing samples treated with or without anti-GFP antibody. Ct values with and without antibody samples were normalized to input control. Untransformed Col-0 and *med17* seedlings were taken as negative control. *CAB1*, which does not possess any E2F binding motifs in its promoter, was used as a negative control. YFP-MED17 binding on promoters was calculated as fold enrichment. ChIP-qPCR analysis was performed on three technical replicates (n=3) from a single representative experiment. Experiments were independently repeated twice (biological replicates; n=2). Bar plots represent mean values and error bars denote SD. Statistical difference has been depicted by *p* value as assessed by one-way ANOVA and Tukey's HSD posthoc test. For all the graphs, *p*-value of 0.05 or lower ( $p \leq 0.05$ ) was considered statistically significant, whereas *p* value greater than 0.05 ( $p > 0.05$ ) was considered non-significant (ns).

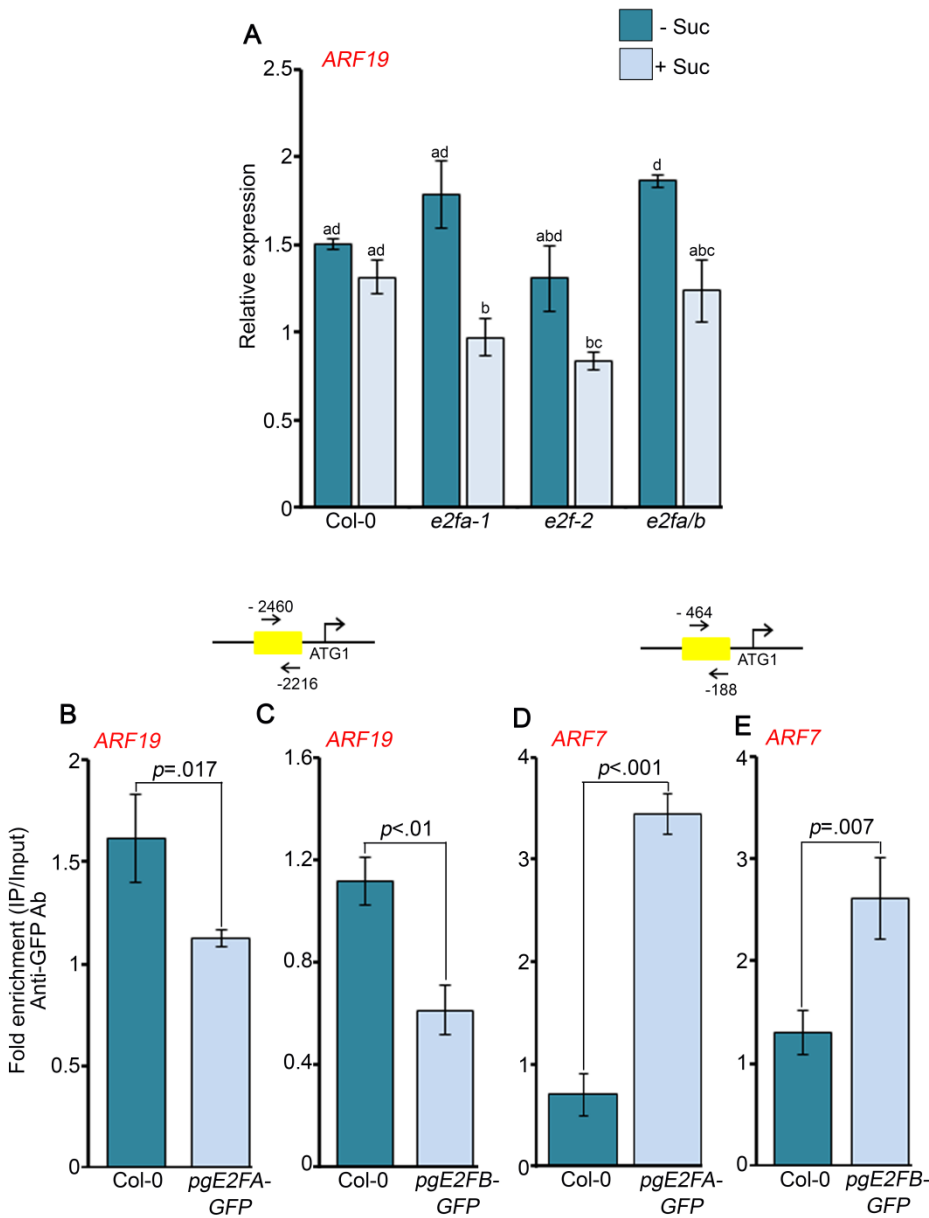

**Supplemental Figure S6. Second biological replicate showing enrichment of E2FA and E2FB at the promoters of auxin responsive TF genes.** **A**, RT-qPCR showing expression of *ARF19* in Col-0, *e2fa-1*, *e2fb-2* and *e2fa/b* seedlings after sucrose treatment. 7-day old seedlings were treated with 90 mM sucrose for 3 hr. Gene expression values were calculated as  $\Delta Ct$ . RT-qPCR analysis was performed on three independent biological replicates (n=3). Bar plots represent mean values and error bars denote SE. Statistical difference has been depicted by *p* value as assessed by one-way ANOVA and Tukey's HSD posthoc test. **B-E**, ChIP-qPCR showing enrichment of E2FA-GFP and E2FB-GFP at the promoter of *ARF7* (related to Figure 7B-C) but not at the promoter of *ARF19* in seven-day-old seedlings. Amplicon positions relative to ATG are shown in the upper panel. Amount of immunoprecipitated DNA was quantified by comparing samples treated with or without anti-GFP antibody. Ct values with and without antibody samples were normalized to input control. Untransformed Col-0 seedlings were taken as negative control. Binding of E2FA-GFP and E2FB-GFP on the promoters was calculated as fold enrichment. ChIP-qPCR analysis was performed on three technical replicates (n=3) from a single representative

experiment. Experiments were independently repeated twice (biological replicates;  $n=2$ ). Bar plots represent mean values and error bars denote SD. Statistical difference has been depicted by  $p$  value as assessed by paired ttest. For all the graphs,  $p$ -value of 0.05 or lower ( $p \leq 0.05$ ) was considered statistically significant, whereas  $p$  value greater than 0.05 ( $p > 0.05$ ) was considered non-significant (ns).



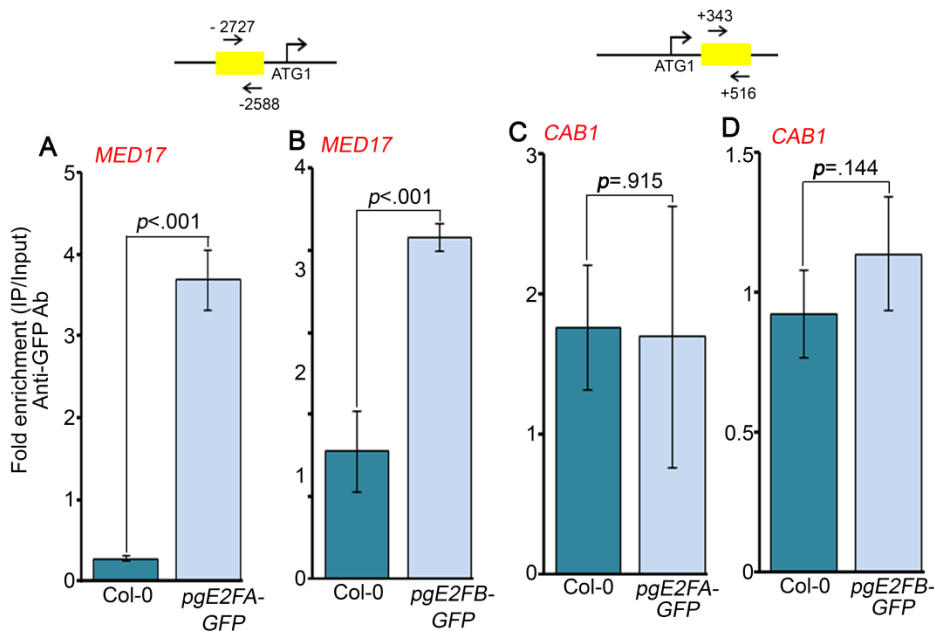

**Supplemental Figure S7. Second biological replicate showing enrichment of E2FA and E2FB at the promoter of *MED17*.** A-D, ChIP-qPCR showing enrichment of E2FA-GFP and E2FB-GFP at the promoter of *MED17* and *CAB1* in seven-day-old Col-0, *pgE2FA-GFP*, and *pgE2FB-GFP* seedlings (related to figure 9E). Amplicon positions relative to ATG are shown in the upper panel. Amount of immunoprecipitated DNA was quantified by comparing samples treated with or without anti-GFP antibody. Ct values with and without antibody samples were normalized to input control. Untransformed Col-0 seedlings were taken as negative control. *CAB1*, which does not possess any E2F binding motifs in its promoter, was used as a negative control. E2FA and E2FB binding on promoters was calculated as fold enrichment. ChIP-qPCR analysis was performed on three technical replicates ( $n=3$ ) from a single representative experiment. Experiments were independently repeated twice (biological replicates;  $n=2$ ). Bar plots represent mean values and error bars denote SD. Statistical difference has been depicted by  $p$  value as assessed by paired ttest. For all the graphs,  $p$ -value of 0.05 or lower ( $p \leq 0.05$ ) was considered statistically significant, whereas  $p$  value greater than 0.05 ( $p > 0.05$ ) was considered non-significant (ns).

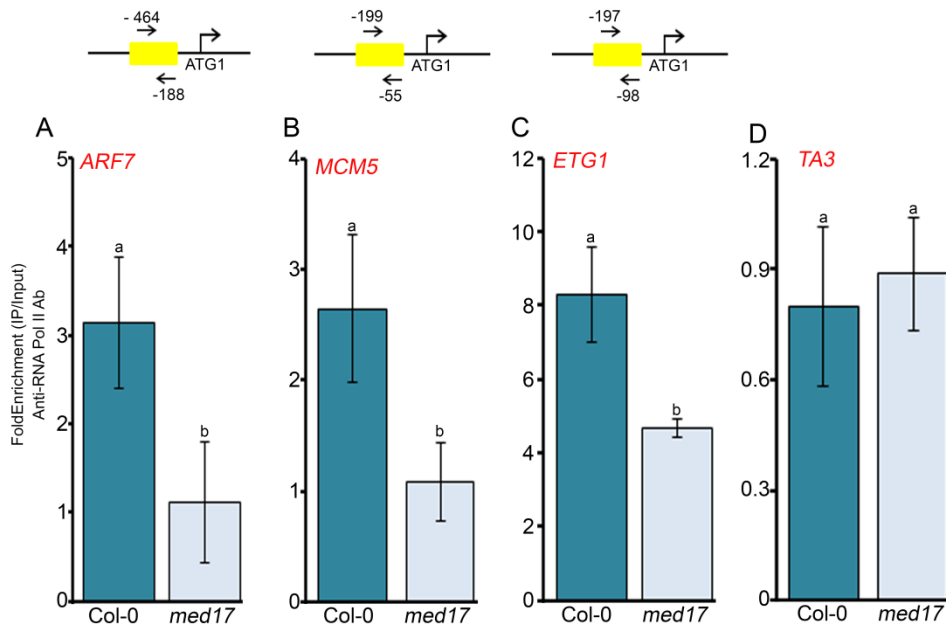

**Supplemental Figure S8. MED17 is required for enrichment of RNA Pol II on the promoters of *ARF7* and cell cycles genes.** A-D, ChIP-qPCR showing enrichment of RNA Pol II at the promoters of *ARF7*, *MCM5* and *ETG1* genes in seven-day-old Col-0 and *med17* seedlings. *TA3* was used as negative control. Amount of immunoprecipitated DNA was quantified by comparing samples treated with or without anti-RNA Pol II antibody. Ct values with and without antibody samples were normalized to input control. RNA Pol II binding on promoters was calculated as fold enrichment. ChIP-qPCR analysis was performed on three technical replicates (n=3) from a single representative experiment. Experiments were independently repeated twice (biological replicates; n=2). Bar plots represent mean values and error bars denote SD. Statistical difference has been depicted by *p* value as assessed by paired ttest. For all the graphs, *p*-value of 0.05 or lower ( $p \leq 0.05$ ) was considered statistically significant, whereas *p* value greater than 0.05 ( $p > 0.05$ ) was considered non-significant (ns).

**Supplemental Table S1. Primers used in this study.**

|                  |                            |
|------------------|----------------------------|
| <b>RT-qPCR</b>   |                            |
| qRT_LBD16FP      | TCCGGTCTCGCCACAGA          |
| qRT_LBD16RP      | ACGTCCTGCTCGTGTGCT         |
| qRT_LBD18FP      | CCGTACTIONTACTCCGAGCAA     |
| qRT_LBD18RP      | CTGGCTCCGAACACTTTATGC      |
| qRT_LBD29FP      | GTCATGAACAAGGAGCTTCACACT   |
| qRT_LBD29RP      | AGAAGCATTGCTAGCTCCAAAGA    |
| qRT_LBD33FP      | TGACTATGGCCACGACCAATT      |
| qRT_LBD33RP      | TCCGTCGGCATTGTTCAA         |
| qRT_MCM5FP       | CAATTCGCCAGCCTTATATCCGAGT  |
| qRT_MCM5RP       | GGAGCGATCTTGGTGCAAATGTTC   |
| qRT_MCM7FP       | GCCGACGCTAATGGCAGATCTAA    |
| qRT_MCM7RP       | GCGGCGGAGAAAATTGAAACATATC  |
| qRT_ETG1F        | CCCACGCCTCCATTGTCTTATCC    |
| qRT_ETG1RP       | GAAGTGTGCGGCAATGTGATCATTC  |
| qRT_ORC6FP       | CGCCGCCACTAGGTTGCAGATTA    |
| qRT_ORC6RP       | ACAGCCAAATTGAACCGCCAATTC   |
| qRT_ARF7FP       | TGACGGTGATTCCAGGAACA       |
| qRT_ARF7RP       | CAGGCACAAAGCCATTATCAAC     |
| qRT_ARF19FP      | TGGAGGACTGTGGCCCAAT        |
| qRT_ARF19RP      | ACCCTCGTTTTTTGAACCTTTGTAT  |
| qRT_MED17FP      | CCCGTGATGATTCTCCAACAG      |
| qRT_MED17RP      | CGTCCGTGCTTCCTCCAGTA       |
| 18S_FP           | TGCAACAAACCCCGACTTATG      |
| 18S_RP           | CCCGCGTCGACCTTTTATC        |
| GAPC2_FP         | TGCCATCCCTCAATGGAAA        |
| GAPC2_RP         | GAGACATCAACGGTTGGAACAC     |
| <b>ChIP-qPCR</b> |                            |
| ChIP_MED17FP     | GTAATTTGAGTATCAATTGGGTG    |
| ChIP_MED17RP     | ACTATTGGCCATGTTATCAAC      |
| ChIP_CAB1FP      | TCCCTGAGCTTTTGGCTAGA       |
| ChIP_CAB1RP      | AACGGCTCCCATCAAATAA        |
| ChIP_Pro_CAB1_FP | GGAATTGGCTTATTAGTTGTG      |
| ChIP_Pro_CAB1_RP | CTTAATTAGCACCTGTATTGACC    |
| ChIP_MCM5FP      | AGAAAGAAAGACCCAATAACCAAC   |
| ChIP_MCM5RP      | TCTAAACGAAGAGAGAGAGTGGG    |
| ChIP_ETG1FP      | GTTGGAAGTTGGAGAATGGG       |
| ChIP_ETG1RP      | CGAATTAAGGGCAATGTCAA       |
| ChIP_ARF7FP      | GATTTCTTTTTATAGAAACCCGTCTC |
| ChIP_ARF7RP      | CTCAGCTTTTTATCTCCGACAG     |
| ChIP_ARF19FP     | GAGACATAGAGGCATACACTCA     |
| ChIP_ARF19RP     | ATACGCATGCACCATATATAAC     |
| ChIP_TA3_FP      | CTGCGTGGAAGTCTGTCAA        |

|                   |                                 |
|-------------------|---------------------------------|
| ChIP_TA3_RP       | CTATGCCACAGGGCAGTTTT            |
| <b>Cloning</b>    |                                 |
| Pentr_Med17 Δ1_FP | CACCATGGATAGCGACATGGAA          |
| Pentr_Med17 Δ1_RP | CCCAGCAACTGTTACTGC              |
| Pentr_Med17 Δ2_FP | CACCATGACCAGACCTAAGCCG          |
| Pentr_Med17 Δ2_RP | CTCATTGCTGGCATTGAAG             |
| Pentr_Med17 Δ3_FP | CACCATGCTGGCCATTAATGTA          |
| Pentr_Med17 Δ3_RP | TCCACTTATGTTGAATCC              |
| Pentr_Med17 Δ4_FP | CACCATGGAAATGAGCATCGGC          |
| Pentr_Med17 Δ4_RP | GCGATTAGGGAACCCTAG              |
| Pentr_ARF7_FP     | CACCATGAAAGCTCCTTCATCAAATG      |
| Pentr_ARF7_RP     | CCGGTTAAACGAAGTGGC              |
| Pentr_E2FA_FP     | CACCATGTCCGGTGTCGTACGATC        |
| Pentr_E2FA_RP     | TCTCGGGGTTGAGTCAACAG            |
| Pentr_E2FB_FP     | CACCATGTCTGAAGAAGTACCTCAACAATTC |
| Pentr_E2FB_RP     | GCTACCTGTAGGTGATCTCGTAGC        |
| Petr_ProARF7_FP   | CACCCATGAACGCTAGTTTATGAAACTC    |
| Petr_ProARF7_RP   | GATCACTCAACTTTACTTTCTCTGAAG     |
